# Supplementary material for: Nanoscale phase separation in the bulk heterojunction structure of perylene bisimide and porphyrin by controlling intermolecular interactions
Source: Royal Society of Chemistry journal article supplement (doi:10.1039/c4ra05532b), 2014-01-01
Supplement: c4ra05532b1.pdf [file c4ra05532b1.pdf]

Supplementary Information

## **Nanoscale Phase Separation in Bulk Heterojunction Structure of Perylene Bisimide and Porphyrin by Controlling Intermolecular Interactions**

Yunan Zhang,<sup>a,b</sup> Wenqiang Zhang,<sup>a</sup> Li Nian,<sup>a</sup> Yuyu Pan,<sup>b</sup> Zengqi Xie,<sup>\* a</sup> Linlin Liu,<sup>a</sup>

Yuguang Ma<sup>\*a,b</sup>

*<sup>a</sup>Institute of Polymer Optoelectronic Materials and Devices, State Key Laboratory of Luminescent Materials and Devices, South China University of Technology, Guangzhou 510640, P. R. China.*

*<sup>b</sup>State Key Laboratory of Supramolecular Structure and Materials, Jilin University, Changchun 130012, P. R. China.*

*\*Corresponding author. E-mail: ygma@scut.edu.cn, msxiez@scut.edu.cn*

### **Table of contents**

|                                       |   |
|---------------------------------------|---|
| S1. Morphology characterization ..... | 2 |
| S2. Electrochemistry behavior .....   | 2 |
| S3. OPV performances .....            | 3 |

## S1. Morphology characterization

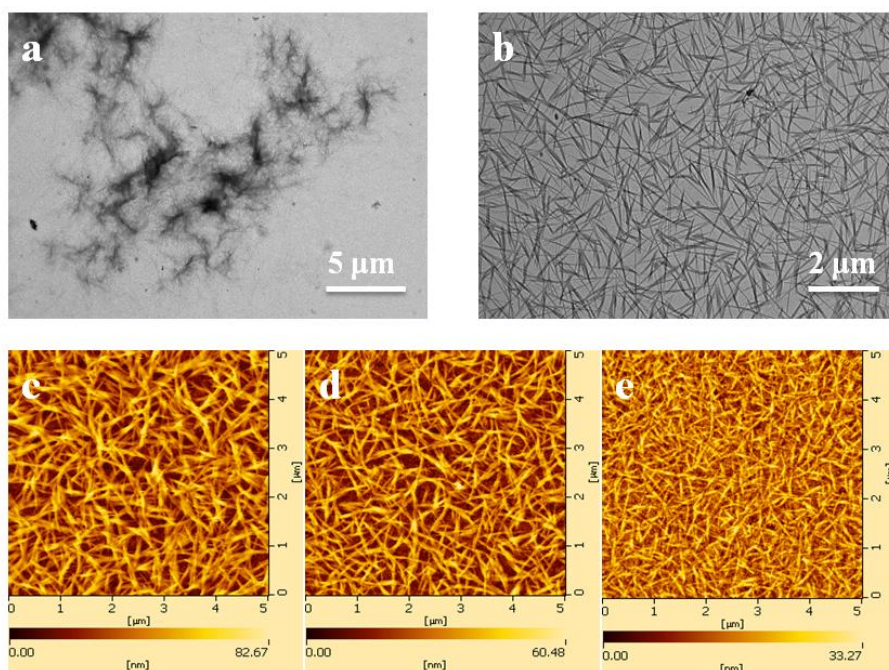

**Figure S1.** TEM image of **PBI-1** aggregates formed during drop-casting process on formvar stabilized with carbon support films from 1 mg/mL (a) chlorobenzene (b) THF solutions, AFM height images of **PBI-1** aggregates formed during spin-coating process on ITO from (c) 3 mg/mL, (d) 2 mg/mL, and (e) 1 mg/mL THF solutions at room temperature.

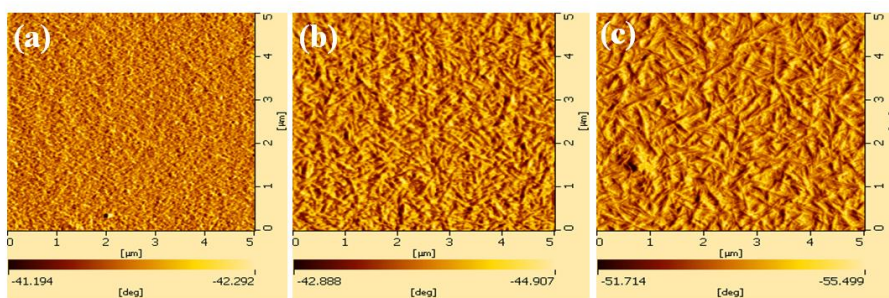

**Figure S2.** AFM height images of blend films with ratio of **PBI-1:Zn-mTNP** = (a) 1:9, (b) 2:8, (c) 3:7.

## S2. Electrochemistry behavior

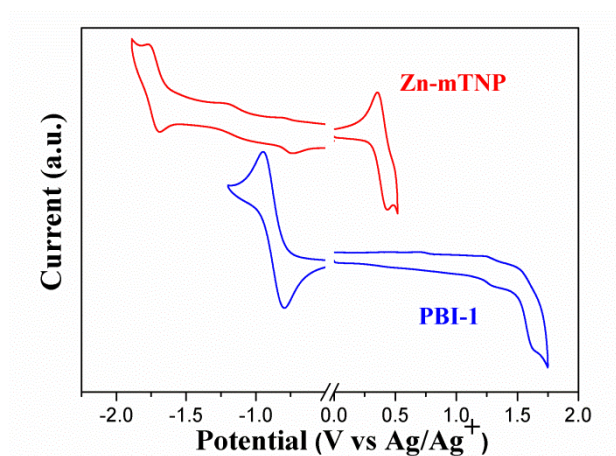

**Figure S3.** Cyclic voltammograms of **PBI-1** and **Zn-mTNP**. A glass-carbon disk electrode was used as the working electrode, a Pt wire as the counter electrode, Ag/Ag<sup>+</sup> as the reference electrode with ferrocene as the internal standard and Bu4NPF6 (0.1 M) as the electrolyte. The oxidation and reduction cycles were measured in CH<sub>2</sub>Cl<sub>2</sub> and N, N-dimethylformamide (DMF), respectively.

## S3. OPV performances

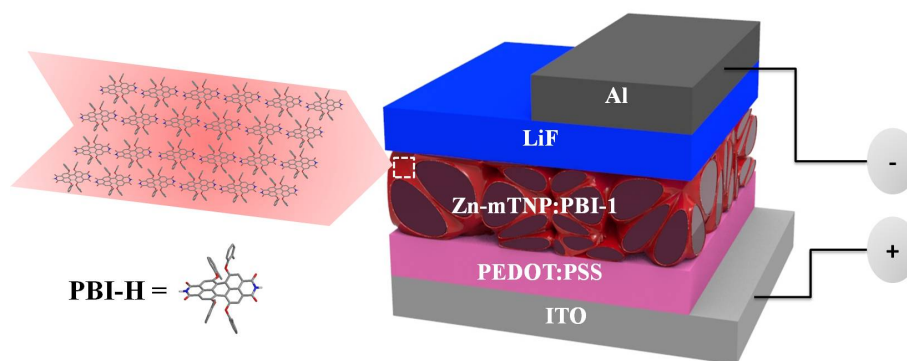

**Figure S4.** Schematic illustration of the device structure.

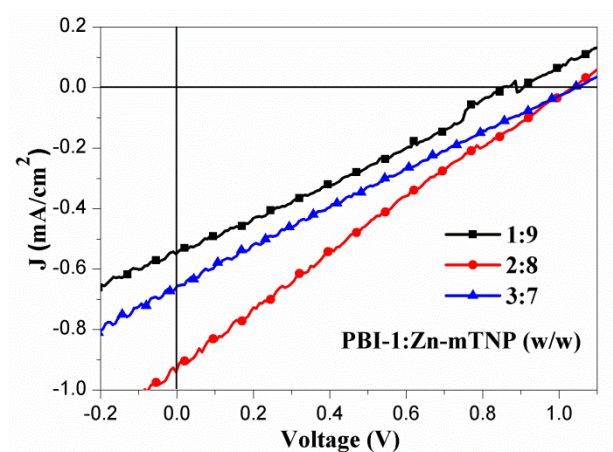

**Figure S5.** J-V curves of OPVs based on **PBI-1/Zn-mTNP** (w/w) under the illumination of AM 1.5G, 100mW cm<sup>-2</sup>.

**Table S1.** Photovoltaic properties of OPVs based on **PBI-1/Zn-mTNP** (w/w) under the illumination of AM 1.5G, 100mW cm<sup>-2</sup>.

| <b>PBI-1/Zn-mTNP</b><br>(w/w) | J <sub>sc</sub> (mA cm <sup>-2</sup> ) | V <sub>oc</sub><br>(V) | FF   | PCE (%) |
|-------------------------------|----------------------------------------|------------------------|------|---------|
| <b>1:9</b>                    | 0.53                                   | 0.95                   | 0.26 | 0.13    |
| <b>2:8</b>                    | 0.93                                   | 1.03                   | 0.23 | 0.22    |
| <b>3:7</b>                    | 0.66                                   | 1.03                   | 0.25 | 0.17    |
| <b>4:6</b>                    | 0.28                                   | 1.06                   | 0.20 | 0.06    |
| <b>5:5</b>                    | 0.06                                   | 0.71                   | 0.22 | 0.01    |
